# Supplementary material for: Polymeric Caffeic Acid Acts as a Nasal Vaccine Formulation against Streptococcus pneumoniae Infections in Mice
Source: MDPI journal article supplement (doi:10.3390/pharmaceutics13040585), 2021-04-20
Supplement: s1 [file s1]

## Supplementary Materials: Polymeric Caffeic Acid Acts as a Nasal Vaccine Formulation against *Streptococcus pneumoniae* Infections in Mice

Rui Tada, Hidehiko Suzuki, Miki Ogasawara, Daisuke Yamanaka, Yoshiyuki Adachi, Jun Kunisawa and Yoichi Negishi

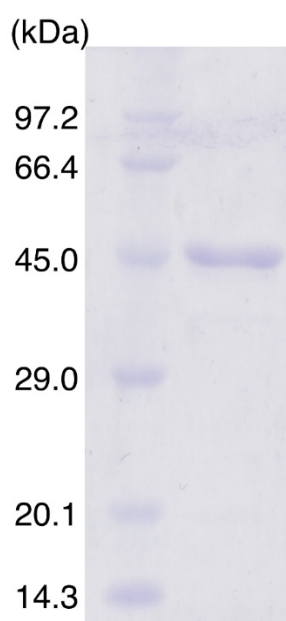

**Figure S1.** Preparation of recombinant PspA protein. The recombinant PspA protein was subject to SDS-PAGE followed by CBB staining. Lane 1; size marker, Lane 2; PspA.
